# Supplementary material
Source: PubMed Central journal article supplement (PMC2148382)
Supplement: pnas_0709915104_1.pdf [file pnas_0709915104_1.pdf]

Table I. Summary of the distribution of frustration in natural proteins, computed over a database of 314 monomeric domains

|                     |                      | Mutational    | Configurational | Residue level |                  |
|---------------------|----------------------|---------------|-----------------|---------------|------------------|
| Direct interactions | Highly frustrated    | 12022 (4.4%)  | 15751 (5.8%)    | 4931 (10.9%)  | All interactions |
|                     | Neutral              | 83707 (30.7%) | 93017 (34.1%)   | 23078 (51.1%) |                  |
|                     | Minimally frustrated | 88076 (32.3%) | 75037 (27.7%)   | 17129 (38.0%) |                  |
| Water mediated      | Highly frustrated    | 11550 (4.2%)  | 10314 (3.8%)    |               |                  |
|                     | Neutral              | 53883 (19.8%) | 51821 (19.0%)   |               |                  |
|                     | Minimally frustrated | 23435 (8.6%)  | 26733 (9.8%)    |               |                  |
| Total               |                      | 272673 (100%) | 272673 (100%)   | 45138 (100%)  |                  |
